# Supplementary material for: Within-Household Clustering of Genetically Related Plasmodium Falciparum Infections In A Moderate Transmission Area of Uganda
Source: Research Square preprint supplement (doi:10.21203/rs.3.rs-113858/v1), 2020-12-01
Supplement: Supplementary file 1 [file 20622f6f539d83e47c6a8cb3.docx]

**SUPPLEMENTAL MATERIAL**

| **Loci** | **Total Number of Samples** | **He** | **Frequency of unique alleles** |
| --- | --- | --- | --- |
| AS1 | 379 | 0.373236 | 6 |
| AS2 | 427 | 0.781991 | 9 |
| AS3 | 478 | 0.862258 | 11 |
| AS32 | 422 | 0.670702 | 14 |
| AS7 | 341 | 0.407152 | 4 |
| AS8 | 375 | 0.572796 | 6 |
| AS11 | 467 | 0.696728 | 9 |
| AS12 | 431 | 0.576449 | 5 |
| AS14 | 412 | 0.761331 | 13 |
| AS15 | 487 | 0.838911 | 13 |
| AS19 | 304 | 0.624587 | 7 |
| AS21 | 309 | 0.520069 | 5 |
| AS34 | 410 | 0.513373 | 6 |
| AS25 | 558 | 0.87599 | 23 |
| B7M19 | 423 | 0.609322 | 10 |
| TA109 | 592 | 0.838387 | 20 |
| AS31 | 479 | 0.77306 | 17 |
| Ara2 | 478 | 0.825871 | 11 |
| PfPK2 | 547 | 0.867574 | 21 |
| TA1 | 571 | 0.90873 | 23 |
| TA87 | 644 | 0.901268 | 17 |
| TA81 | 570 | 0.82103 | 13 |
| TA60 | 453 | 0.833851 | 11 |
| PolyA | 740 | 0.94846 | 34 |
| PFG377 | 446 | 0.616685 | 9 |
| TA40 | 534 | 0.900672 | 21 |

**Supplemental Table 1:** Diversity at each microsatellite marker. Avg He 0.73.


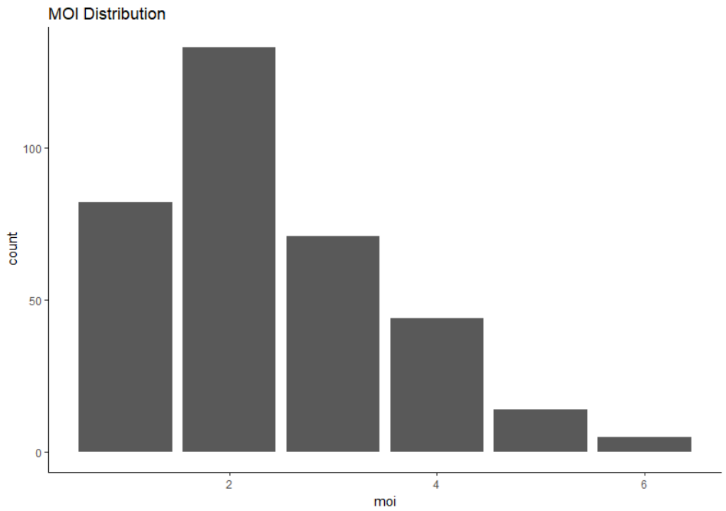

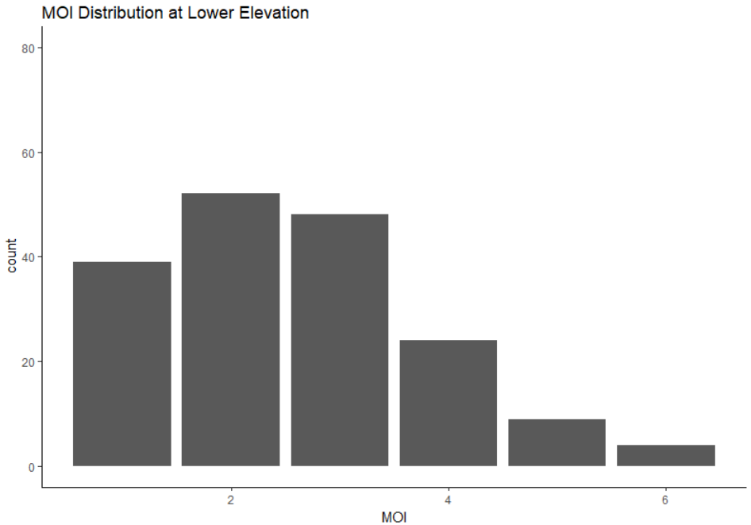

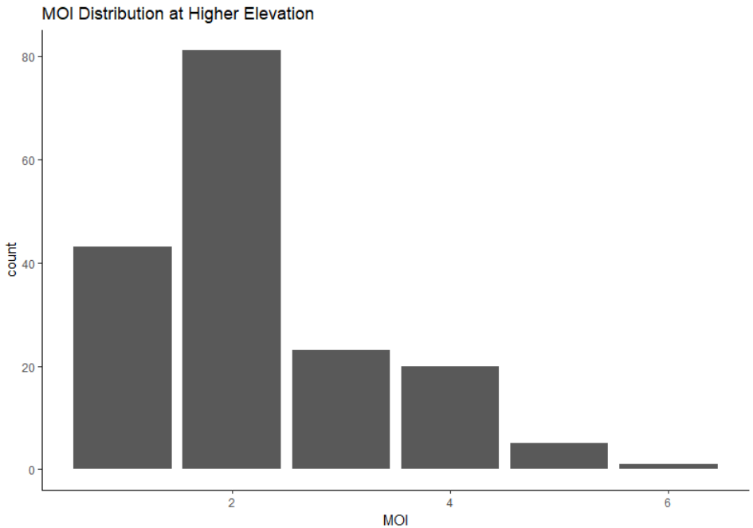


**Supplemental Figure 1:** MOI distribution. A) Overall distribution of MOI B) Distribution of MOI at lower elevation C) Distribution of MOI at higher elevation
